# Supplementary material
Source: Springer Nature journal article supplement (https://www.springermedizin.de/resource/supplementary/40169_2013_40_MOESM1_ESM.pdf/9675436)

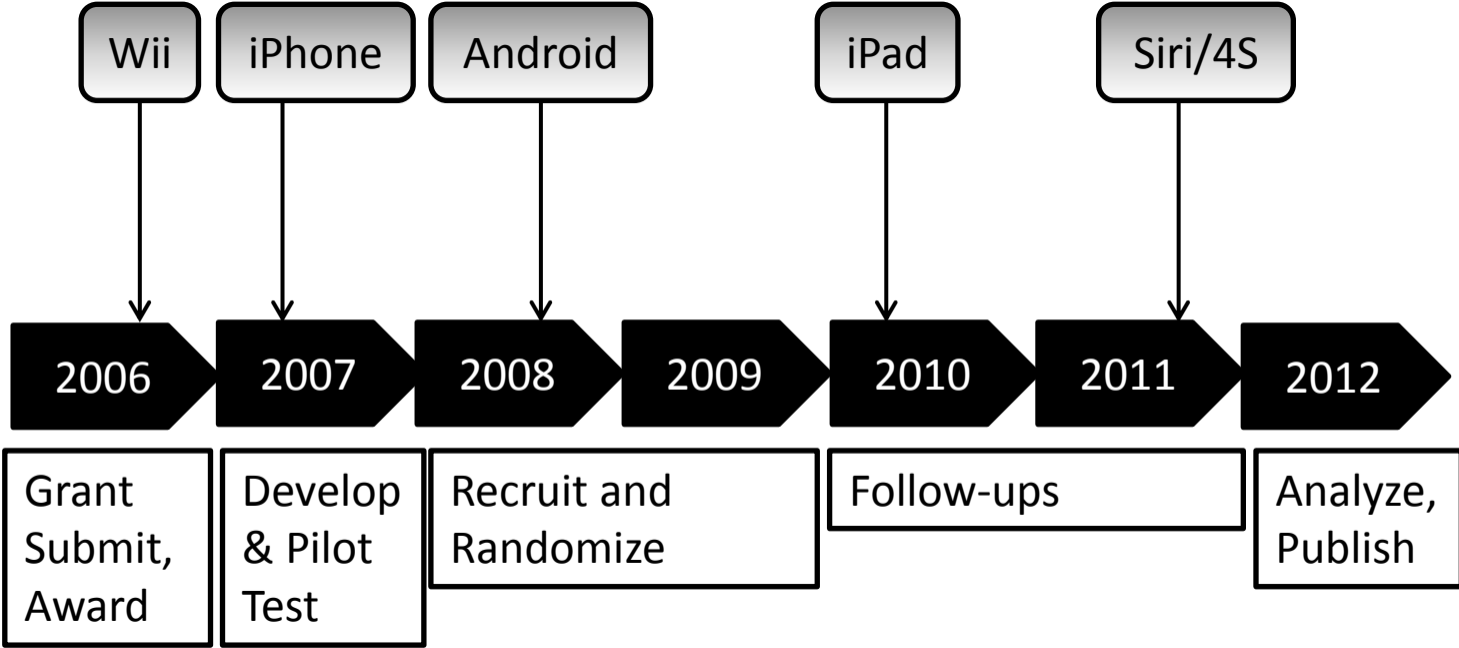

Supplement: MOESM1 [file 9675436]
